# Supplementary material for: Circular RNA Encoded Amyloid Beta peptides—A Novel Putative Player in Alzheimer’s Disease
Source: MDPI journal article supplement (doi:10.3390/cells9102196), 2020-09-29
Supplement: s1 [file s1]

|                                  |   |                                                    |     |     |     |     |
|----------------------------------|---|----------------------------------------------------|-----|-----|-----|-----|
|                                  |   | 10                                                 | 20  | 30  | 40  | 50  |
|                                  |   | CGTCTTGG-CCAACATGATTAGTGAACCAAGGATCAGTTACGGAACGAT  |     |     |     |     |
| circAB-a-JR1-amplicon.seq(1>499) | → | CGTCTTGG-CCAACATGATTAGTGAACCAAGGATCAGTTACGGAACGAT  |     |     |     |     |
| R-AD3-R-58_1.seq(8>437)          | ← | CATGATTAGTGAACCAAGGATCAGTTACGGAACGAT               |     |     |     |     |
| R-ND3-R-59_1.seq(17>460)         | ← | ACATGATTAGTGAACCAAGGATCAGTTACGGAACGAT              |     |     |     |     |
| AD1-R-48_1.seq(31>437)           | ← | ACATGATTAGTGAACCAAGGATCAGTTACGGAACGAT              |     |     |     |     |
| R-ND3-F-50_1.seq(9>455)          | → | AACGAT                                             |     |     |     |     |
|                                  |   | 60                                                 | 70  | 80  | 90  | 100 |
|                                  |   | GCTCTCATGC-CAT-CTTTGACCGAAACGAAAAC-CACCGTGGAGCTCCT |     |     |     |     |
| circAB-a-JR1-amplicon.seq(1>499) | → | GCTCTCATGC-CAT-CTTTGACCGAAACGAAAAC-CACCGTGGAGCTCCT |     |     |     |     |
| R-AD3-R-58_1.seq(8>437)          | ← | GCTCTCATGC-CAT-CTTTGACCGAAACGAAAAC-CACCGTGGAGCTCCT |     |     |     |     |
| R-ND3-R-59_1.seq(17>460)         | ← | GCTCTCATGC-CAT-CTTTGACCGAAACGAAAAC-CACCGTGGAGCTCCT |     |     |     |     |
| AD1-R-48_1.seq(31>437)           | ← | GCTCTCATGC-CAT-CTTTGACCGAAACGAAAAC-CACCGTGGAGCTCCT |     |     |     |     |
| R-ND3-F-50_1.seq(9>455)          | → | GCTCTCATGC-CAT-CTTTGACCGAAACGAAAAC-CACCGTGGAGCTCCT |     |     |     |     |
| R-AD3-F-49_1.seq(9>440)          | → | CAT-CTTTGACCGAAACGAAAAC-CACCGTGGAGCTCCT            |     |     |     |     |
| AD1-F-45_1.seq(29>436)           | → | CACCGTGGAGCTCCT                                    |     |     |     |     |
|                                  |   | 110                                                | 120 | 130 | 140 | 150 |
|                                  |   | TCCCGTGAATGGAGAGTTCAGCCTGGACGATCTCCAGCCGTGGCATTCTT |     |     |     |     |
| circAB-a-JR1-amplicon.seq(1>499) | → | TCCCGTGAATGGAGAGTTCAGCCTGGACGATCTCCAGCCGTGGCATTCTT |     |     |     |     |
| R-AD3-R-58_1.seq(8>437)          | ← | TCCCGTGAATGGAGAGTTCAGCCTGGACGATCTCCAGCCGTGGCATTCTT |     |     |     |     |
| R-ND3-R-59_1.seq(17>460)         | ← | TCCCGTGAATGGAGAGTTCAGCCTGGACGATCTCCAGCCGTGGCATTCTT |     |     |     |     |
| AD1-R-48_1.seq(31>437)           | ← | TCCCGTGAATGGAGAGTTCAGCCTGGACGATCTCCAGCCGTGGCATTCTT |     |     |     |     |
| R-ND3-F-50_1.seq(9>455)          | → | TCCCGTGAATGGAGAGTTCAGCCTGGACGATCTCCAGCCGTGGCATTCTT |     |     |     |     |
| R-AD3-F-49_1.seq(9>440)          | → | TCCCGTGAATGGAGAGTTCAGCCTGGACGATCTCCAGCCGTGGCATTCTT |     |     |     |     |
| AD1-F-45_1.seq(29>436)           | → | TCCCGTGAATGGAGAGTTCAGCCTGGACGATCTCCAGCCGTGGCATTCTT |     |     |     |     |
|                                  |   | 160                                                | 170 | 180 | 190 | 200 |
|                                  |   | TTGGGGCTGACTCTGTGCCAGCCAACACAGAAAACGAAGTTGAGCCTGTT |     |     |     |     |
| circAB-a-JR1-amplicon.seq(1>499) | → | TTGGGGCTGACTCTGTGCCAGCCAACACAGAAAACGAAGTTGAGCCTGTT |     |     |     |     |
| R-AD3-R-58_1.seq(8>437)          | ← | TTGGGGCTGACTCTGTGCCAGCCAACACAGAAAACGAAGTTGAGCCTGTT |     |     |     |     |
| R-ND3-R-59_1.seq(17>460)         | ← | TTGGGGCTGACTCTGTGCCAGCCAACACAGAAAACGAAGTTGAGCCTGTT |     |     |     |     |
| AD1-R-48_1.seq(31>437)           | ← | TTGGGGCTGACTCTGTGCCAGCCAACACAGAAAACGAAGTTGAGCCTGTT |     |     |     |     |
| R-ND3-F-50_1.seq(9>455)          | → | TTGGGGCTGACTCTGTGCCAGCCAACACAGAAAACGAAGTTGAGCCTGTT |     |     |     |     |
| R-AD3-F-49_1.seq(9>440)          | → | TTGGGGCTGACTCTGTGCCAGCCAACACAGAAAACGAAGTTGAGCCTGTT |     |     |     |     |
| AD1-F-45_1.seq(29>436)           | → | TTGGGGCTGACTCTGTGCCAGCCAACACAGAAAACGAAGTTGAGCCTGTT |     |     |     |     |
|                                  |   | 210                                                | 220 | 230 | 240 | 250 |
|                                  |   | GATGCCCCCCTGCTGCCGACCGAGGACTGACCACTCGACCAGGTTCTGG  |     |     |     |     |
| circAB-a-JR1-amplicon.seq(1>499) | → | GATGCCCCCCTGCTGCCGACCGAGGACTGACCACTCGACCAGGTTCTGG  |     |     |     |     |
| R-AD3-R-58_1.seq(8>437)          | ← | GATGCCCCCCTGCTGCCGACCGAGGACTGACCACTCGACCAGGTTCTGG  |     |     |     |     |
| R-ND3-R-59_1.seq(17>460)         | ← | GATGCCCCCCTGCTGCCGACCGAGGACTGACCACTCGACCAGGTTCTGG  |     |     |     |     |
| AD1-R-48_1.seq(31>437)           | ← | GATGCCCCCCTGCTGCCGACCGAGGACTGACCACTCGACCAGGTTCTGG  |     |     |     |     |
| R-ND3-F-50_1.seq(9>455)          | → | GATGCCCCCCTGCTGCCGACCGAGGACTGACCACTCGACCAGGTTCTGG  |     |     |     |     |
| R-AD3-F-49_1.seq(9>440)          | → | GATGCCCCCCTGCTGCCGACCGAGGACTGACCACTCGACCAGGTTCTGG  |     |     |     |     |
| AD1-F-45_1.seq(29>436)           | → | GATGCCCCCCTGCTGCCGACCGAGGACTGACCACTCGACCAGGTTCTGG  |     |     |     |     |
|                                  |   | 260                                                | 270 | 280 | 290 | 300 |
|                                  |   | GTTGACAAATATCAAGACGGAGGAGATCTCTGAAGTGAAGATGGATGCAG |     |     |     |     |
| circAB-a-JR1-amplicon.seq(1>499) | → | GTTGACAAATATCAAGACGGAGGAGATCTCTGAAGTGAAGATGGATGCAG |     |     |     |     |
| R-AD3-R-58_1.seq(8>437)          | ← | GTTGACAAATATCAAGACGGAGGAGATCTCTGAAGTGAAGATGGATGCAG |     |     |     |     |
| R-ND3-R-59_1.seq(17>460)         | ← | GTTGACAAATATCAAGACGGAGGAGATCTCTGAAGTGAAGATGGATGCAG |     |     |     |     |
| AD1-R-48_1.seq(31>437)           | ← | GTTGACAAATATCAAGACGGAGGAGATCTCTGAAGTGAAGATGGATGCAG |     |     |     |     |
| R-ND3-F-50_1.seq(9>455)          | → | GTTGACAAATATCAAGACGGAGGAGATCTCTGAAGTGAAGATGGATGCAG |     |     |     |     |
| R-AD3-F-49_1.seq(9>440)          | → | GTTGACAAATATCAAGACGGAGGAGATCTCTGAAGTGAAGATGGATGCAG |     |     |     |     |
| AD1-F-45_1.seq(29>436)           | → | GTTGACAAATATCAAGACGGAGGAGATCTCTGAAGTGAAGATGGATGCAG |     |     |     |     |

|                                  |   |                                                    |     |     |     |     |
|----------------------------------|---|----------------------------------------------------|-----|-----|-----|-----|
|                                  |   | 310                                                | 320 | 330 | 340 | 350 |
|                                  |   | AATTCGACATGACTCAGGATATGAAGTTCATCATCAAAAATTGGTGTTTC |     |     |     |     |
| circAB-a-JR1-amplicon.seq(1>499) | → | AATTCGACATGACTCAGGATATGAAGTTCATCATCAAAAATTGGTGTTTC |     |     |     |     |
| R-AD3-R-58_1.seq(8>437)          | ← | AATTCGACATGACTCAGGATATGAAGTTCATCATCAAAAATTGGTGTTTC |     |     |     |     |
| R-ND3-R-59_1.seq(17>460)         | ← | AATTCGACATGACTCAGGATATGAAGTTCATCATCAAAAATTGGTGTTTC |     |     |     |     |
| AD1-R-48_1.seq(31>437)           | ← | AATTCGACATGACTCAGGATATGAAGTTCATCATCAAAAATTGGTGTTTC |     |     |     |     |
| R-ND3-F-50_1.seq(9>455)          | → | AATTCGACATGACTCAGGATATGAAGTTCATCATCAAAAATTGGTGTTTC |     |     |     |     |
| R-AD3-F-49_1.seq(9>440)          | → | AATTCGACATGACTCAGGATATGAAGTTCATCATCAAAAATTGGTGTTTC |     |     |     |     |
| AD1-F-45_1.seq(29>436)           | → | AATTCGACATGACTCAGGATATGAAGTTCATCATCAAAAATTGGTGTTTC |     |     |     |     |
|                                  |   | 360                                                | 370 | 380 | 390 | 400 |
|                                  |   | TTTGCAGAAGATGTGGGTTCAAACAAAGGTGCAATCATTGGACTCATGGT |     |     |     |     |
| circAB-a-JR1-amplicon.seq(1>499) | → | TTTGCAGAAGATGTGGGTTCAAACAAAGGTGCAATCATTGGACTCATGGT |     |     |     |     |
| R-AD3-R-58_1.seq(8>437)          | ← | TTTGCAGAAGATGTGGGTTCAAACAAAGGTGCAATCATTGGACTCATGGT |     |     |     |     |
| R-ND3-R-59_1.seq(17>460)         | ← | TTTGCAGAAGATGTGGGTTCAAACAAAGGTGCAATCATTGGACTCATGGT |     |     |     |     |
| AD1-R-48_1.seq(31>437)           | ← | TTTGCAGAAGATGTGGGTTCAAACAAAGGTGCAATCATTGGACTCATGGT |     |     |     |     |
| R-ND3-F-50_1.seq(9>455)          | → | TTTGCAGAAGATGTGGGTTCAAACAAAGGTGCAATCATTGGACTCATGGT |     |     |     |     |
| R-AD3-F-49_1.seq(9>440)          | → | TTTGCAGAAGATGTGGGTTCAAACAAAGGTGCAATCATTGGACTCATGGT |     |     |     |     |
| AD1-F-45_1.seq(29>436)           | → | TTTGCAGAAGATGTGGGTTCAAACAAAGGTGCAATCATTGGACTCATGGT |     |     |     |     |
|                                  |   | 410                                                | 420 | 430 | 440 | 450 |
|                                  |   | GGGCGGTGTTGTCATAGCGACA-GTGATCGTCATCACCTTGTTGATG-CT |     |     |     |     |
| circAB-a-JR1-amplicon.seq(1>499) | → | GGGCGGTGTTGTCATAGCGACA-GTGATCGTCATCACCTTGTTGATG-CT |     |     |     |     |
| R-AD3-R-58_1.seq(8>437)          | ← | GGGCGGTGTTGTCATAGCGACA-GTGATCGTCATCACCTTGTTGATG    |     |     |     |     |
| R-ND3-R-59_1.seq(17>460)         | ← | GGGCGGTGTTGTCATAGCGACA-GTGATCGTCATCACCTTGTTGATG-CT |     |     |     |     |
| AD1-R-48_1.seq(31>437)           | ← | GGGCGGTGTTGTCATAGCGACA                             |     |     |     |     |
| R-ND3-F-50_1.seq(9>455)          | → | GGGCGGTGTTGTCATAGCGACA-GTGATCGTCATCACCTTGTTGATG-CT |     |     |     |     |
| R-AD3-F-49_1.seq(9>440)          | → | GGGCGGTGTTGTCATAGCGACA-GTGATCGTCATCACCTTGTTGATG-CT |     |     |     |     |
| AD1-F-45_1.seq(29>436)           | → | GGGCGGTGTTGTCATAGCGACA-GTGATCGTCATCACCTTGTTGATG-CT |     |     |     |     |
|                                  |   | 460                                                | 470 | 480 | 490 | 500 |
|                                  |   | GAAGAAGAAAC-AGTACACATCCATTCATCATGGTGTGGTGGAGATGAGC |     |     |     |     |
| circAB-a-JR1-amplicon.seq(1>499) | → | GAAGAAGAAAC-AGTACACATCCATTCATCATGGTGTGGTGGAGATGAGC |     |     |     |     |
| R-ND3-R-59_1.seq(17>460)         | ← | GAAGAAGAAAC                                        |     |     |     |     |
| R-ND3-F-50_1.seq(9>455)          | → | GAAGAAGAAAC-AGTACACATCCATTCATCATGGTGTGGTGGAGATG    |     |     |     |     |
| R-AD3-F-49_1.seq(9>440)          | → | GAAGAAGAAAC-AGTACACATCCATTCATCATGGTGTGGTGGAGATGA   |     |     |     |     |
| AD1-F-45_1.seq(29>436)           | → | GAAGAAGAAAC-AGTACACATCCATTCATCATGGTGTGGTGGAGAT     |     |     |     |     |
|                                  |   | 510                                                |     |     |     |     |
|                                  |   | TGCTTC                                             |     |     |     |     |
| circAB-a-JR1-amplicon.seq(1>499) | → | TGCTTC                                             |     |     |     |     |
