# Supplementary material for: Circular RNA Encoded Amyloid Beta peptides—A Novel Putative Player in Alzheimer’s Disease
Source: MDPI journal article supplement (doi:10.3390/cells9102196), 2020-09-29
Supplement: s1 [file s1]

|                                        |   |                                              |
|----------------------------------------|---|----------------------------------------------|
|                                        |   | 10203040                                     |
|                                        |   | TTGTCATAGCGACAGTGATCGTCATCACCTTGGTGATGCTGAAG |
| AD3-R-60_1.seq(7>104)                  | ← | TTGTCATAGCGACAGTGATCGTCATCACCTTGGTGATGCTGAAG |
| ND3-R-61_1.seq(4>98)                   | ← | TCATAGCGACAGTGATCGTCATCACCTTGGTGATGCTGAAG    |
| circAB-a-junction region-WT.seq(1>148) | → | GTCATAGCGACAGTGATCGTCATCACCTTGGTGATGCTGAAG   |
|                                        |   | 50607080                                     |
|                                        |   | AAGAAACAGTACACATCCATTCATCATGGTGTGGTGGAGATGAG |
| AD3-R-60_1.seq(7>104)                  | ← | AAGAAACAGTACACATCCATTCATCATGGTGTGGTGGAGATGAG |
| ND3-R-61_1.seq(4>98)                   | ← | AAGAAACAGTACACATCCATTCATCATGGTGTGGTGGAGATGAG |
| circAB-a-junction region-WT.seq(1>148) | → | AAGAAACAGTACACATCCATTCATCATGGTGTGGTGGAGATGAG |
| ND3-F-52_1.seq(14>113)                 | → | GTACACATCCATTCATCATGGTGTGGTGGAGATGAG         |
| AD3-F-51_1.seq(3>107)                  | → | GTACACATCCATTCATCATGGTGTGGTGGAGATGAG         |
|                                        |   | 90100110120130                               |
|                                        |   | CTGCTTCAGAAAGAGCAAACTATTTCAGATGACGTCTTGGCCAA |
| AD3-R-60_1.seq(7>104)                  | ← | CTGCTTCAGA                                   |
| ND3-R-61_1.seq(4>98)                   | ← | CTGCTTCAGA                                   |
| circAB-a-junction region-WT.seq(1>148) | → | CTGCTTCAGAAAGAGCAAACTATTTCAGATGACGTCTTGGCCAA |
| ND3-F-52_1.seq(14>113)                 | → | CTGCTTCAGAAAGAGCAAACTATTTCAGATGACGTCTTGGCCAA |
| AD3-F-51_1.seq(3>107)                  | → | CTGCTTCAGAAAGAGCAAACTATTTCAGATGACGTCTTGGCCAA |
|                                        |   | 140150                                       |
|                                        |   | CATGATTAGTGAACCAAGAAGCTTG                    |
| circAB-a-junction region-WT.seq(1>148) | → | CATGATTAGTGAACCAAG                           |
| ND3-F-52_1.seq(14>113)                 | → | CATGATTAGTGAACCAAGAA                         |
| AD3-F-51_1.seq(3>107)                  | → | CATGATTAGTGAACCAAGAAGCTTG                    |
